# Supplementary material for: Efficient CO2conversion by biocompatible N-doped carbon nanosheets coupled withRalstonia eutropha: synergistic interactions between microbial and inorganic catalysts
Source: Royal Society of Chemistry journal article supplement (doi:10.1039/d3gc00855j), 2023-01-01
Supplement: d3gc00855j1.pdf [file d3gc00855j1.pdf]

Electronic Supplementary Information for

## Efficient CO<sub>2</sub> Conversion by Biocompatible N-doped Carbon Nanosheets coupled with *Ralstonia eutropha*: Synergistic Interactions between Microbial and Inorganic Catalysts

Jiani Yao,<sup>a</sup> Youzhi Li,<sup>b</sup> Siyuan Xiu,<sup>a</sup> Shujie Zheng,<sup>c</sup> Ying Huang,<sup>c</sup> Zijing Zhou,<sup>d</sup> Yang Hou,<sup>a</sup> Bin Yang,<sup>a,b</sup> Lecheng Lei,<sup>a,b</sup> Zhongjian Li<sup>\*a,b</sup>

a. Key Laboratory of Biomass Chemical Engineering of Ministry of Education, College of Chemical and Biological Engineering, Zhejiang University, Hangzhou 310027, China

b. Institute of Zhejiang University - Quzhou, Quzhou, 324000, China

c. School of Environment, Hangzhou Institute for Advanced Study, University of Chinese Academy of Sciences, Hangzhou 310024, China

d. Zanvyl Krieger School of Arts & Sciences, Johns Hopkins University, Baltimore, MD 21218, USA

### Table of contents

|                                                                                                                                                                            |     |
|----------------------------------------------------------------------------------------------------------------------------------------------------------------------------|-----|
| Text 1 Electrode Fabrication and Characterization .....                                                                                                                    | S3  |
| Text 2 Hybrid System Construction .....                                                                                                                                    | S5  |
| Text 3 Analysis and Assays .....                                                                                                                                           | S6  |
| Figure S1 SEM images .....                                                                                                                                                 | S8  |
| Figure S2 TEM images .....                                                                                                                                                 | S9  |
| Figure S3 STEM image .....                                                                                                                                                 | S10 |
| Figure S4 The high-resolution C 1s and N 1s XPS spectra .....                                                                                                              | S11 |
| Figure S5 XRD patterns .....                                                                                                                                               | S12 |
| Figure S6 CV curves for the ECSA calculation. ....                                                                                                                         | S13 |
| Figure S7 LSV curves and Tafel plots of NC-8-1000 and NiMoZn in MM and 1 M PBS.....                                                                                        | S14 |
| Figure S8 The energy efficiency of converting electrical energy into organic matter, biomass, and PHB in the hybrid system.....                                            | S15 |
| Figure S9 Spot assay of <i>R. eutropha</i> H16 for different concentrations of metal ions.....                                                                             | S16 |
| Figure S10 RRDE polarization curves in O <sub>2</sub> -saturated MM solution and H <sub>2</sub> O <sub>2</sub> selectivity and electron transfer number of NC-8-1000 ..... | S17 |
| Figure S11 The effect of metal ions on ROS production. ....                                                                                                                | S18 |
| Figure S12 OD <sub>600</sub> in the long-term experiment .....                                                                                                             | S19 |
| Figure S13 Maximum yield of biomass and PHB, the content of PHB in DCW, and 24h-maximum energy efficiency at different applied currents in the long-term experiment .....  | S20 |
| Figure S14 Survival rate of <i>R. eutropha</i> H16 on the surface of electrodes.....                                                                                       | S21 |
| Figure S15 Tafel plot of NC-8-1000, NC-8-1000 loading <i>R. eutropha</i> H16, and NC-8-1000 loading C5ΔMBHASH .....                                                        | S22 |
| Figure S16 The Bader charge and electron localization function (ELF) calculation results.....                                                                              | S23 |
| Table S1 Atomic percent (at. %) of C, N, and O of all samples obtained from XPS results .....                                                                              | S24 |

|                                                                                                                                                      |     |
|------------------------------------------------------------------------------------------------------------------------------------------------------|-----|
| Table S2 Atomic concentrations (at. %) of C-C, C-N, C-O, and C=O of all samples in the C 1s binding energy region .....                              | S25 |
| Table S3 Atomic concentrations (at. %) of Pyridinic N, Pyrrolic N, Graphitic N, and Oxidated N of all samples in the N 1s binding energy region..... | S26 |
| Table S4 BET results of all samples.....                                                                                                             | S27 |
| Table S5 Comparison of the HER performance of all samples.....                                                                                       | S28 |
| Table S6 Comparison of the HER performance of NC-8-1000, NiMoZn, and NC-8-1000 after 6 cycles in different electrolytes .....                        | S29 |
| Table S7 Analysis of variance for the performance of microbial electrosynthesis in the long-term experiment .....                                    | S30 |
| Table S8 Comparison to previous studies of bioelectrochemical systems for CO <sub>2</sub> fixation.....                                              | S31 |
| Table S9 EDS result of NC-8-1000/CP .....                                                                                                            | S32 |
| Table S10 EDS result of NC-8-1000@CP after 6 cycles .....                                                                                            | S33 |
| Table S11 Comparison of the HER performance of NC-8-1000, NC-8-1000 loading <i>R. eutropha</i> H16 and NC-8-1000 loading C5ΔMBHASH .....             | S34 |

## Text 1 Electrode Fabrication and Characterization

**NC.** NC precursor was synthesized by mixing a given mass ratio of  $\text{NH}_4\text{Cl}$  (Sigma-Aldrich, AR) and Ethylene Diamine Tetraacetic Acid (EDTA, Sigma-Aldrich, AR) into 250 mL deionized water under intensely stirring for 1h at  $60^\circ\text{C}$ , the solution was concentrated by rotary evaporation and then dried at  $60^\circ\text{C}$  for 12 h. The ground mixture was then annealed under an argon atmosphere at a heating rate of  $10^\circ\text{C min}^{-1}$  for 2 h at  $1000^\circ\text{C}$ . The mass ratios of  $\text{NH}_4\text{Cl}$  and EDTA were selected as 8:1, 4:1, 1:and 1, 0 (only EDTA). The precursor with a mass ratio of  $\text{NH}_4\text{Cl}$  to EDTA of 8:1 was additionally carbonized at 900 and  $800^\circ\text{C}$ . The obtained products were named as NC-8-1000, NC-4-1000, NC-1-1000, NC-EDTA-1000, NC-8-900 and NC-8-800, respectively.

**NiMoZn.** The NiMoZn cathodes were prepared by electrodepositing onto 304 stainless steel mesh using a previously reported procedure.<sup>1</sup> The electrolyte consisted of  $\text{NiCl}_2 \cdot 6\text{H}_2\text{O}$  ( $9.51 \text{ g L}^{-1}$ ),  $\text{Na}_2\text{MoO}_4 \cdot 2\text{H}_2\text{O}$  ( $4.84 \text{ g L}^{-1}$ ),  $\text{ZnCl}_2$  ( $0.0409 \text{ g L}^{-1}$ ),  $\text{Na}_4\text{P}_2\text{O}_7$  ( $34.57 \text{ g L}^{-1}$ ) and  $\text{NaHCO}_3$  ( $74.77 \text{ g L}^{-1}$ ). Hydrazine hydrate ( $1.21 \text{ mL L}^{-1}$ ; Alfa Aesar) was added immediately before plating. After pre-treatment at  $-2 \text{ V}$  vs.  $\text{Ag}/\text{AgCl}$  in  $0.5 \text{ M H}_2\text{SO}_4$  for 3 min, the stainless steel was plated at a current density of  $0.0775 \text{ A cm}^{-2}$  for 30 min. The NiMoZn was obtained after leaching for 24 h in  $10 \text{ M KOH}$ .<sup>1</sup>

**Electrochemical measurements.** The linear sweep voltammetry (LSV), electrochemical impedance spectroscopy (EIS), and, cyclic voltammetry (CV) were performed using a versatile electrochemical workstation (VSP300, BioLogic, France) with a typical three-electrode cell. A graphite rod was used as a counter electrode and  $\text{Ag}/\text{AgCl}$  electrode as a reference electrode. The working electrode was prepared by following procedure: the NC catalyst (10mg) was dispersed in  $900 \mu\text{L}$  of ethanol and  $100 \mu\text{L}$  of  $0.5 \text{ wt.}\%$  Nafion. The dispersed solution was sonicated for 1h and stirred for 12h, and then catalyst ink was drop-coated onto a 3 mm glassy carbon electrode (loading concentration  $\sim 0.28 \text{ mg cm}^{-1}$ ) or 2 cm x 2 cm carbon paper (loading concentration  $\sim 1 \text{ mg cm}^{-1}$ ).<sup>1</sup> To determine the HER performance of NC-8-1000 coupled with wild-type *R. eutropha* H16 or C5ΔMBHASH, the corresponding bacteria were cultured to  $\text{OD}_{600} = 2.0$  and 50 mL of bacterial suspension was concentrated to 5ml, and then  $2 \mu\text{L}$  concentrated bacterial suspension was dropped on glassy carbon loaded with NC-8-1000. In the optimization experiment, glassy carbon loaded with catalysts was used as a working electrode for LSV tests while carbon paper loaded with catalysts was used for CV, EIS, and LSV in the comparison experiment with NiMoZn. The LSV was recorded at a scan rate of  $5 \text{ mV s}^{-1}$  and EIS was examined over a frequency range of  $0.1 \text{ MHz} - 0.01 \text{ Hz}$ . All currents were corrected by an 80%  $iR$  compensation. Since the electrochemical active surface area (ECSA) is proportional to the double-layer capacitances ( $C_{dl}$ ), it can be estimated by calculating  $C_{dl}$ , which was acquired by CV in  $1 \text{ M PBS}$  at scan rates from 10 to  $50 \text{ mV s}^{-1}$  in the non-Faradaic region (0.2 to  $0.3 \text{ V}$  vs. RHE). The  $C_{dl}$  was calculated by plotting the  $j_a - j_c$  at  $0.25 \text{ V}$  (where  $j_c$  and  $j_a$  are the cathodic and anodic current density, respectively) vs. RHE against the scan rate, where the slope was twice that of  $C_{dl}$ .

The RRDE curves were collected using a glassy carbon disk electrode surrounded by a Pt ring (4 mm inside diameter). The electron transfer number ( $n$ ) and the corresponding peroxide species ( $\text{HO}_2^-$ ) were calculated with the equation (1) and (2),

$$n = \frac{4I_{disk}}{I_{disk} + I_{ring}/N} \quad (1)$$

$$HO^{2-} (\%) = \frac{200I_{ring}/N}{I_{disk} + I_{ring}/N} \quad (2)$$

where  $I_{disk}$  and  $I_{ring}$  are the disk electrode current and ring electrode current (A), respectively. The Pt ring electrode was polarized at 0.5 V (vs Ag/AgCl), and N is the collection efficiency of the ring electrode (N = 0.42).

**Materials characterization.** Morphological properties were examined using scanning electron microscopy (SEM, Hitachi SU-8010, Japan) and high-resolution transmission electron microscopy (HR-TEM, JEOL, JEM-2100F, Japan). Elemental distributions were assessed by energy dispersive spectroscopy (EDS) using the same SEM and HR-TEM. Surface chemical compositions were analyzed by high resolution X-ray photoelectron spectroscopy (HR-XPS, ThermoFisher 250XI, USA) and X-ray diffraction (XRD, Shimadzu XRD-6000, Japan). Raman spectra were recorded on a Raman microscope (Horiba Jobin Yvon, LabRAM HR Evolution, France) under an excitation laser of 532 nm. The specific surface areas were measured using a surface area analyzer (Micromeritics, ASAP 2460, USA) based on the N<sub>2</sub> physisorption test, and calculated by the Brunauer–Emmett–Teller (BET) method. The pore size distributions were calculated from their N<sub>2</sub> physisorption isotherms using the non-local density functional theory (NL-DFT) method. The water contact angles were measured with a contact angle measuring device (OCA 20, Data Physics Instruments GmbH). The surface functional groups were identified by a Fourier transformation infrared spectrometer coupled with an infrared microscope (FT-IR, EQUINOX 55). The biofilm growth and cell viability were examined using a confocal laser scanning microscopy (CLSM, Olympus FV1200, Japan) with a LIVE/DEAD assay kit (the green/red fluorescence refers to the live/dead cells).

## Text 2 Hybrid System Construction

**Bacterial cultivation.** *Ralstonia eutropha* H16 (ATCC=17699) was purchased from BeNa Culture Collection. C5ΔMBHASH was obtained from Jiazhang Lian's group at Zhejiang University. *R. eutropha* H16 was successively precultured in broth medium and minimal medium with 10 g L<sup>-1</sup> D-fructose at 30°C for 12 h. 20 mL pre-culture were centrifuged at 7000 rpm for 7 min, and then washed twice and resuspended in 5 mL of minimal medium for subsequent inoculation into the reactors. The minimal medium was composed of Na<sub>2</sub>HPO<sub>4</sub>•7H<sub>2</sub>O (18 g L<sup>-1</sup>), KH<sub>2</sub>PO<sub>4</sub> (3 g/L), (NH<sub>4</sub>)<sub>2</sub>SO<sub>4</sub> (0.2 g/L), MgSO<sub>4</sub>•7H<sub>2</sub>O (0.15 g L<sup>-1</sup>), NaHCO<sub>3</sub> (0.3 g L<sup>-1</sup>), ferric citrate (0.05 g L<sup>-1</sup>), CaSO<sub>4</sub>•2H<sub>2</sub>O (1 mg L<sup>-1</sup>), NiSO<sub>4</sub>•7H<sub>2</sub>O (0.56 mg L<sup>-1</sup>), trace element solution (1 mL L<sup>-1</sup>) and gentamicin (10 mg L<sup>-1</sup>). The trace element solution contained (1 L): 1.5 g NTA, 0.3 g H<sub>3</sub>BO<sub>3</sub>, 0.2 g CoCl<sub>2</sub>•6 H<sub>2</sub>O, 0.1 g ZnSO<sub>4</sub>•7 H<sub>2</sub>O, 0.03 g MnCl<sub>2</sub>•4 H<sub>2</sub>O, 0.03 g Na<sub>2</sub>MoO<sub>4</sub>•2 H<sub>2</sub>O, 0.02 g NiCl<sub>2</sub>•6 H<sub>2</sub>O, and 0.01 g CuSO<sub>4</sub>•5 H<sub>2</sub>O. All mediums were sterilized by autoclaving for 30 min, except fructose and gentamicin which were filtered through a sterile filter. The minimal medium was also used as an electrolyte in the bioelectrochemical reactors.

### Gene knockout and construction of C5ΔMBHASH.

Suicide plasmid pK19mobSacB and two homologous templates with a length of 500 bp were applied for gene knockout. The knockout plasmids were constructed by the Gibson method and then introduced into *E. coli* S17 by conjugation. The recombinant strains were screened as follows: the single clones on LB plates were verified by colony PCR, and then the suicide plasmids-bearing bacteria were cultured in LB with 100 g L<sup>-1</sup> sucrose but without NaCl at 30 °C for 72 h. After 72h, the bacteria solution was diluted 1000 times was cultured on an LB plate at 30 °C for 48 h. Several single clones were selected and cultured in LB with and without kanamycin at 30 °C for 24 h respectively. Then the recombinant strain was verified by PCR amplification. Because membrane-bound hydrogenase (MBH) is harder to knock out than soluble hydrogenase (SH) genes, SH was knocked out based on C5ΔMBH, and a hydrogenase-deficient strain C5ΔMBHASH was constructed.

**Reactors.** All experiments were conducted in single enclosed chamber reactors with a working volume of 150 mL at 30°C. The reported data are based on at least three biological replicates ( $n \geq 3$ ). A carbon paper (2 × 2 cm<sup>2</sup>) coated with NC (1mg cm<sup>-2</sup>) or NiMoZn (2 × 2 cm<sup>2</sup>) served as the cathode for HER, while a platinum net was used as an anode for OER. Each reactor contained a 1.5 cm stirring bar rotating at 500 rpm. The reactors after sterilization were filled with 150 mL of minimal medium and then purged with pure CO<sub>2</sub> for 30 min. Subsequently, the resuspended *R. eutropha* H16 was transferred into reactors (initial OD<sub>600</sub> = 0.2 in the general experiment). The cycles ended when the OD decreased significantly, no more than 10 days. In a long-term experiment, the minimal medium was completely renewed at the end of each cycle and *R. eutropha* H16 was reinoculated at the beginning of cycle 2,4,6 until the initial OD<sub>600</sub> reached ~ 0.5. To explore the effect of applied current on the bioelectric conversion of CO<sub>2</sub>, the current density of 4.5, 6, 9 mA cm<sup>2</sup> were applied in cycle 1-2, 3-4, 5-6, respectively. All reactors were operated continuously for 24 h, followed by sampling and CO<sub>2</sub> purging. 2 mL of solution was sampled from each reactor and centrifuged at 7000 rpm for 7 min after detection of OD<sub>600</sub>. The supernatant was used for the detection of metal leaching and the sediment was cryopreserved for subsequent quantification of PHB. The OD<sub>600</sub> was measured by a UV-visible light spectrophotometer (Thermo Scientific Evolution 201, USA) at 600nm. The reactors were galvanostatically controlled by a versatile electrochemical workstation (VSP300, BioLogic, France).

### Text 3 Analysis and Assays

**Toxicant quantification.** Both  $\text{H}_2\text{O}_2$  and  $\bullet\text{OH}$  concentrations were monitored by fluorometric analysis using a microplate reader (infinite 200Pro, TECAN, Switzerland). Specifically,  $\text{H}_2\text{O}_2$  concentration was assayed using an Amplex Red  $\text{H}_2\text{O}_2$  detection kit (Sigma-Aldrich) with  $\lambda_{\text{ex}} = 540 \text{ nm}$  and  $\lambda_{\text{em}} = 590 \text{ nm}$ . The  $\bullet\text{OH}$  concentration was monitored by fluorimetric analysis ( $\lambda_{\text{ex}} = 320 \text{ nm}$ ,  $\lambda_{\text{em}} = 425 \text{ nm}$ ) of the 2-hydroxyterephthalic acid formed by the reaction of  $\bullet\text{OH}$  with terephthalic acid. The concentration of leached metals in the electrodes was measured with an inductively coupled plasma optical emission spectrometer (ICP-OES, Thermo Scientific ICAP Pro X, USA).

A 10  $\mu\text{L}$  culture was diluted 1:100 in the fresh minimal medium for spotting. Four serial 10-fold dilutions of this sample were made, with 2  $\mu\text{L}$  of each was spotted on broth-rich agar plates and allowed to dry on the benchtop. Plates were typically grown at 30 °C for 6 h before imaging.

**The quantification of PHB.** The amount of poly- $\beta$ -hydroxybutyrate (PHB) was analyzed by high-performance liquid chromatography (HPLC, Agilent HPLC 1260, USA) equipped with an Aminex HPX-87H column. Before the HPLC analysis, the sediment of centrifuged samples was digested with 98 wt.%  $\text{H}_2\text{SO}_4$  at 90°C for 60 min. The digested solution was diluted with DI water and passed through a 0.22  $\mu\text{m}$  filter. Samples were analyzed under the following conditions: mobile phase, 2.5mM  $\text{H}_2\text{SO}_4$  aqueous solution; flow rate, 0.5 mL/min; injection volume, 100  $\mu\text{L}$ ; column temperature, 30°C; detection at 210 nm. The interval between two injections was 40 min.

**Efficiency calculation.** The efficiency values reported in this work were calculated based on previous work.<sup>2</sup> To calculate energy efficiency, the following parameters need to be obtained first,

$$OD_{biomass} = OD_{600} - \frac{c_{PHB}}{831} \quad (3)$$

$$c_{biomass} = 448 \times OD_{biomass} \quad (4)$$

$$DCW = c_{biomass} + c_{PHB} \quad (5)$$

where  $OD_{biomass}$  excluding the light scattering from PHB accumulation,  $c_{biomass}$  and  $c_{PHB}$  were the concentration of biomass and PHB converted from  $\text{CO}_2$  ( $\text{mg L}^{-1}$ ), DCW was the dry cell weight ( $\text{mg L}^{-1}$ ).

The electricity conversion efficiency (EE) was defined as follows,

$$EE = \frac{\sum n \times \Delta_r G^0}{I \times U \times t} \quad (5)$$

where  $I$  was the current applied on the reactor (A),  $U$  was the voltage monitored between the cathode and anode (V), and  $t$  was the duration of the reaction (s).  $n$  was the amount of organic converted from  $\text{CO}_2$  (mol).  $\Delta_r G^0$  was the Gibbs free energy gaining from  $\text{CO}_2$  to organic (including biomass and PHB) ( $\text{J mol}^{-1}$ ).  $\Delta_r G^0$  for specific target products, along with the corresponding chemical reactions, are listed in the following,

Biomass formation:

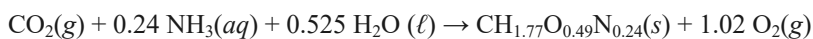

$$\Delta_r G^\circ = 479 \text{ kJ/mol}$$

PHB formation:

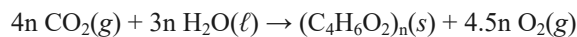

$$\Delta_r G^\circ \sim \Delta_r H^\circ = 1903 \text{ kJ/mol per monomer}$$

**DFT Calculation method.** The present first principle DFT calculations are performed by Vienna Ab initio Simulation Package (VASP)<sup>3</sup> with the projector augmented wave (PAW) method<sup>4</sup>. The exchange-functional is treated using the generalized gradient approximation (GGA) of the Perdew-Burke-Ernzerhof (PBE) functional.<sup>5</sup> All calculations were performed with Spin-polarizations. The energy cutoff for the plane wave basis expansion was set to 520 eV, and the force on each atom less than 0.03 eV/Å was set as the convergence criterion of geometry relaxation. The k-points in the Brillouin zone were sampled by a  $3 \times 3 \times 1$  grid. A convergence energy threshold of  $10^{-5}$  eV was used for the self-consistent calculations. The DFT-D3 method was employed to consider the van der Waals interaction.<sup>6</sup> The computational model was constructed based on a  $5 \times 5$  supercell on the surface of a single layer of graphene (001) (containing 50 atoms). To avoid interactions between periodic structures, a vacuum of 15 Å was added along the z direction.

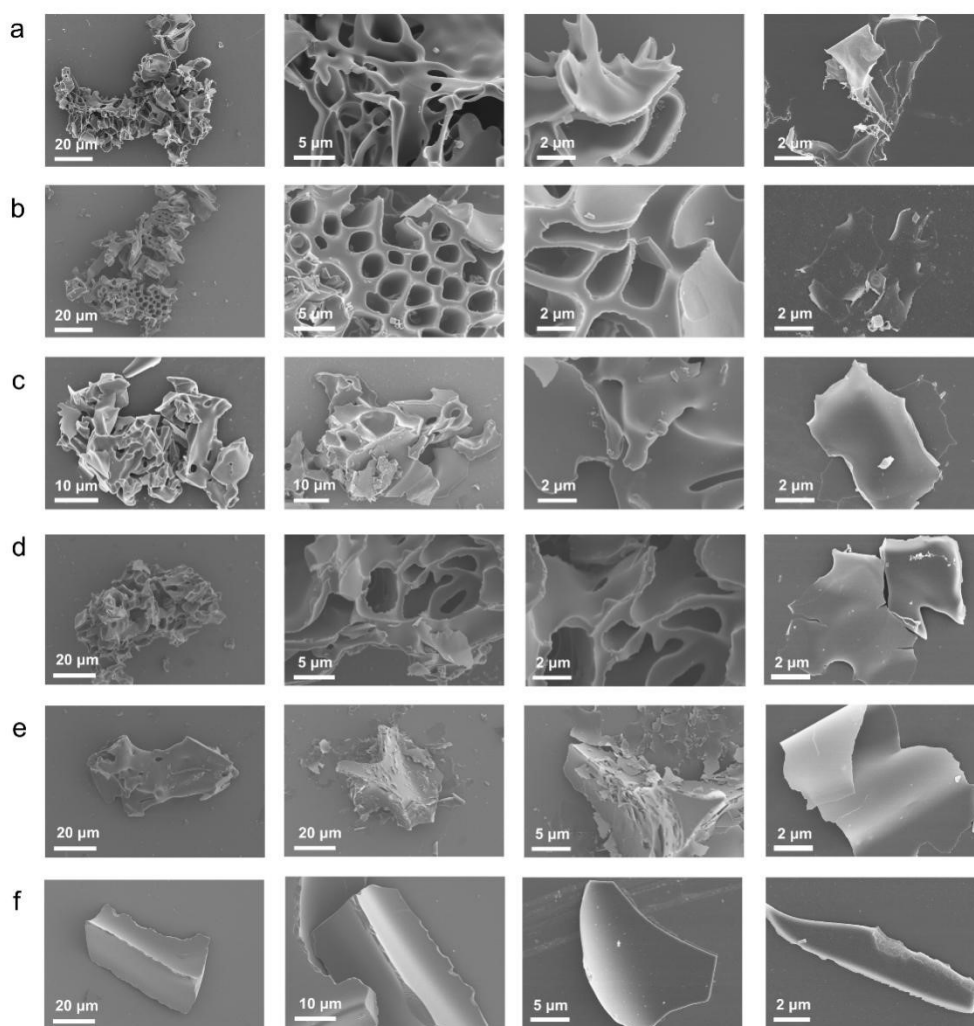

**Figure S1** SEM images of a) NC-8-1000, b) NC-8-900, c) NC-8-800, d) NC-4-1000, e) NC-1-1000, and f) NC-EDTA-1000



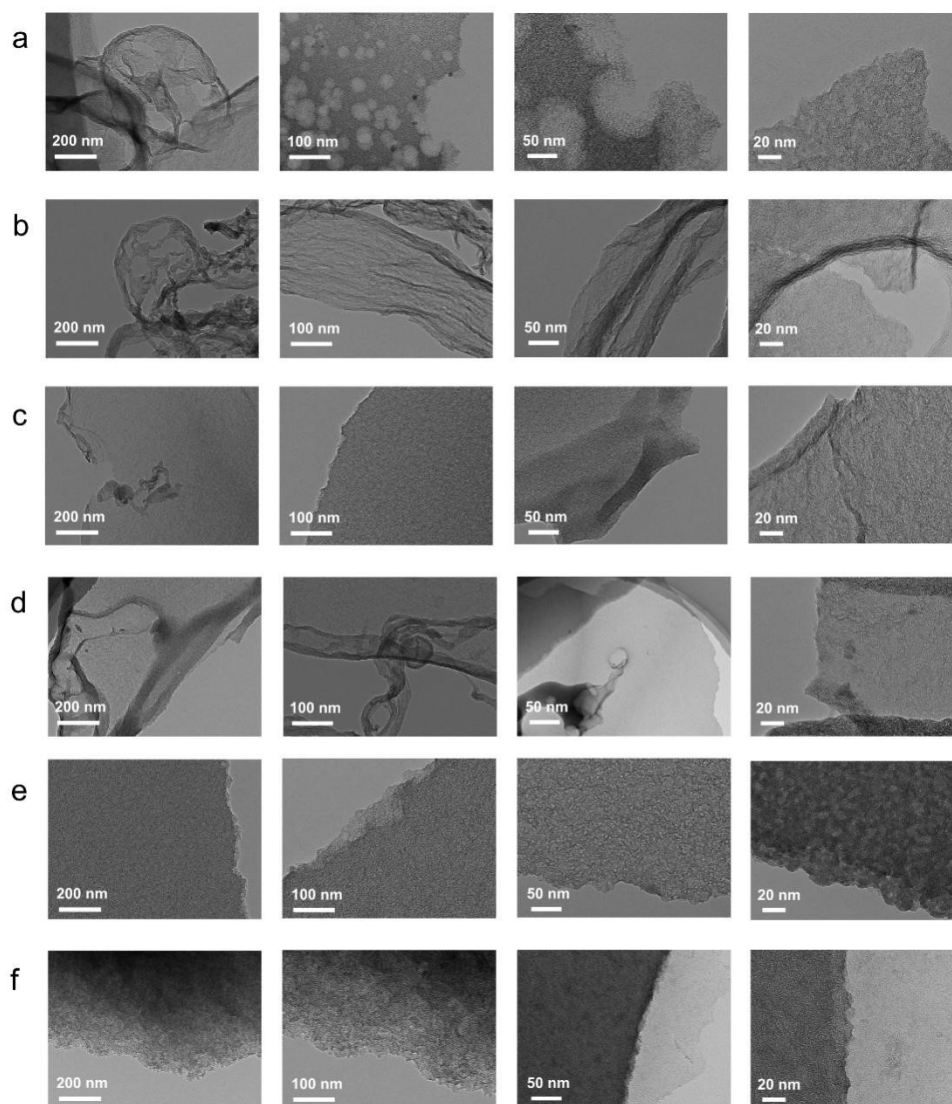

**Figure S2** TEM images of a) NC-8-1000, b) NC-8-900, c) NC-8-800, d) NC-4-1000, e) NC-1-1000, and f) NC-EDTA-1000

To investigate the evolution process of NC, a series of conditional experiments on carbonization temperature and precursor mass ratio were carried out. As shown in the Scanning/transmission electron microscopy (SEM/TEM) images (Fig. S1 and S2), after carbonizing the precursors at a relatively low temperature of 800 °C, three-dimensional porous carbon blocks and scattered few flakes (NC-8-800) can be observed. When the carbonization temperature rose to 1000 °C, a three-dimensional porous carbon network with ultrathin nanosheets was formed (NC-8-1000). Comparing the obtained products with different precursor mass ratios, the NC nanosheets became progressively thinner and showed more convolutions and pores as the  $\text{NH}_4\text{Cl}$  in the precursor increased, while only large carbon blocks (NC-EDTA-1000) could be foamed without the presence of  $\text{NH}_4\text{Cl}$ . It is attributed to more  $\text{NH}_4\text{Cl}$  as a gas-foaming agent, triggering a more vigorous blowing action in the carbonization process at 1000 °C.

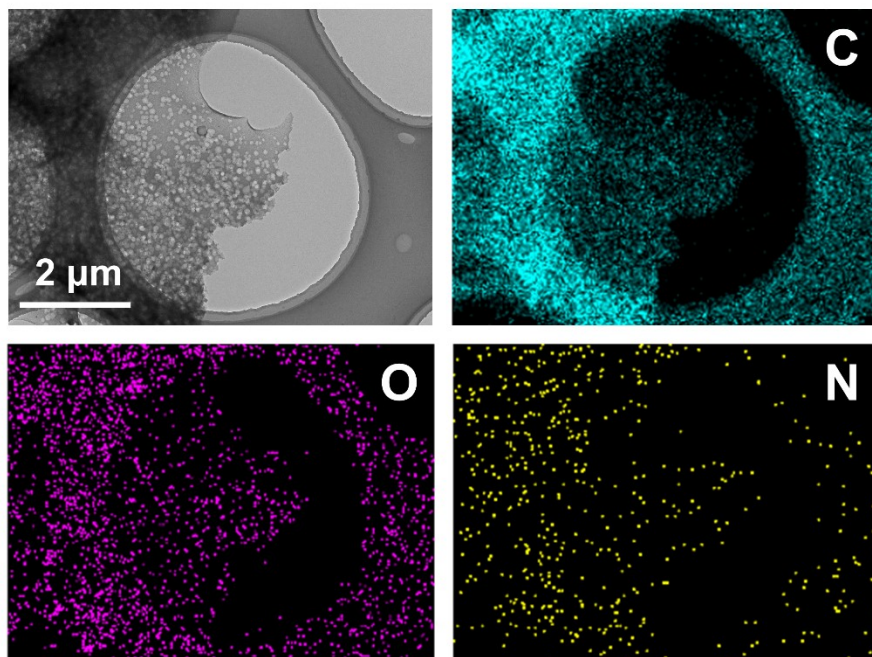

**Figure S3** STEM image of NC-8-1000 and the corresponding elemental mapping images of C, O, and N elements.

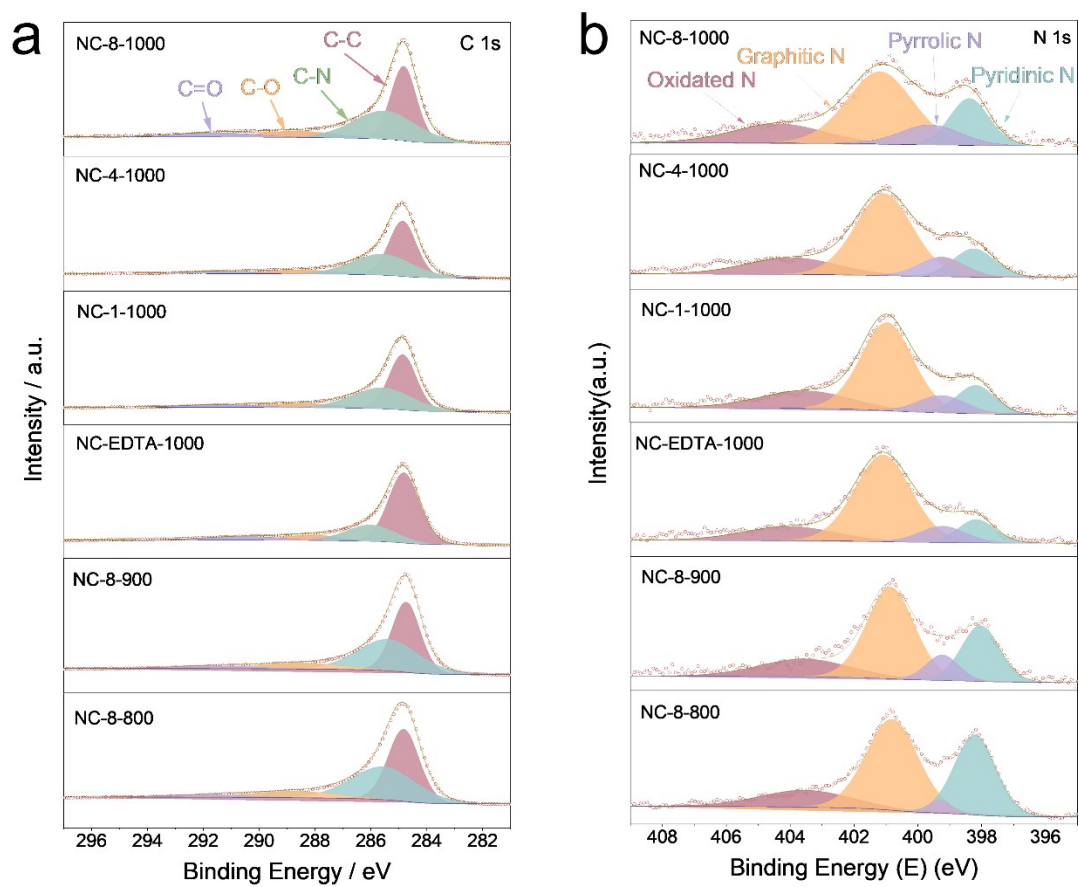

**Figure S4** The high-resolution a) C 1s and b) N 1s XPS spectra of NC-8-1000, NC-8-900, NC-8-800, NC-4-1000, NC-1-1000, and NC-EDTA-1000.

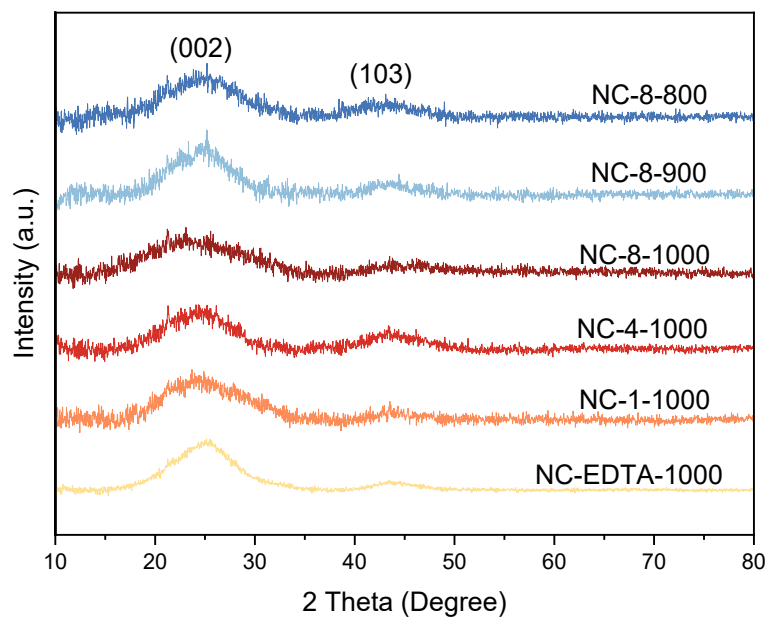

**Figure S5** XRD patterns of NC-8-1000, NC-8-900, NC-8-800, NC-4-1000, NC-1-1000, and NC-EDTA-1000.

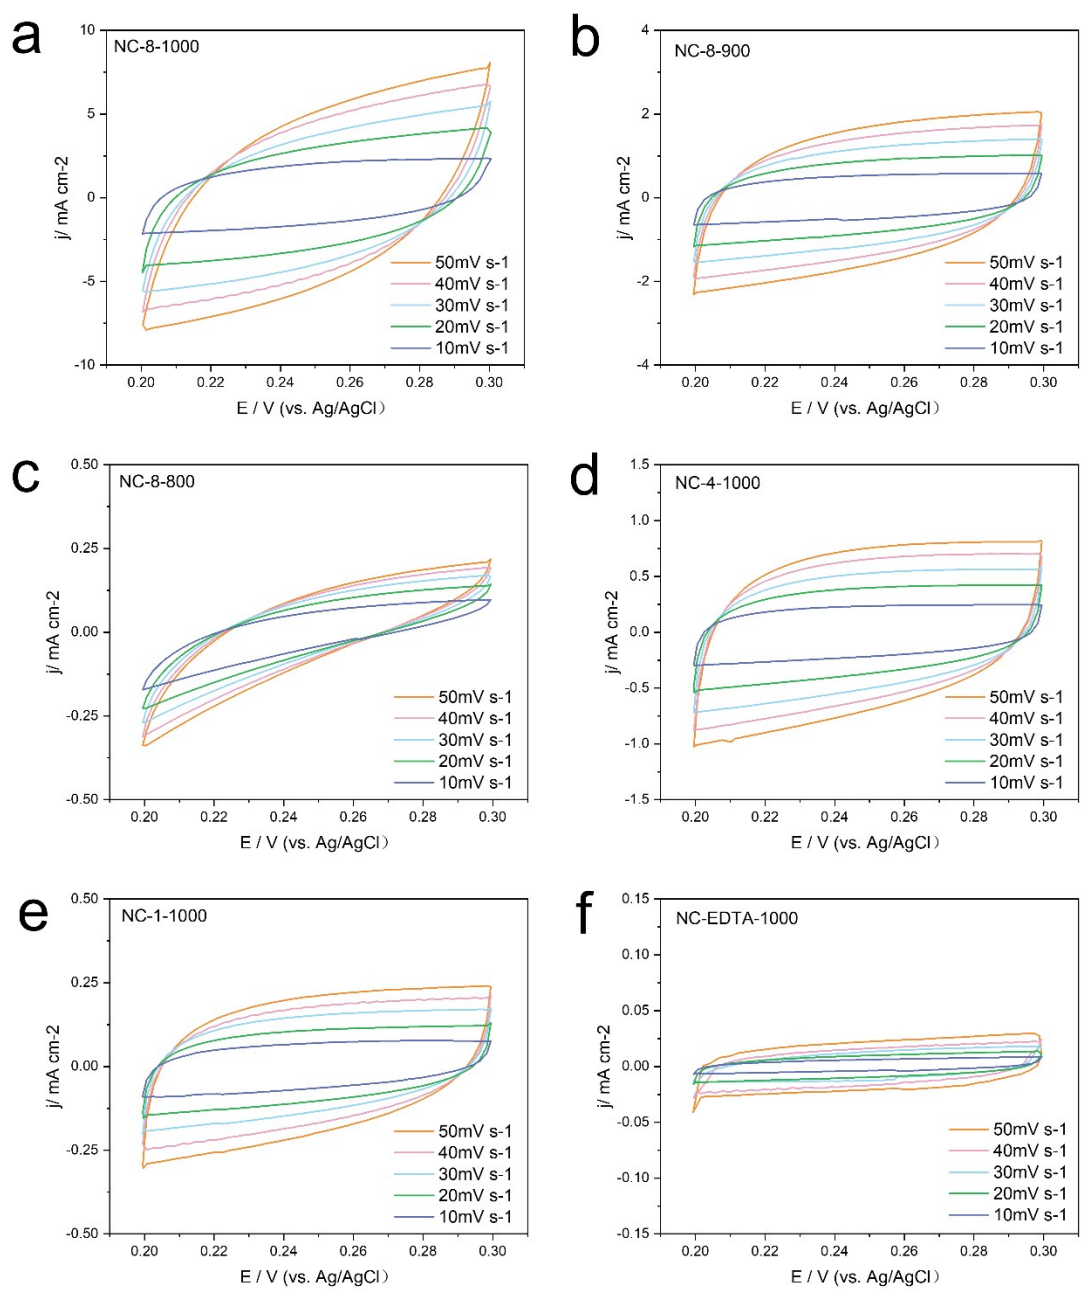

**Figure S6** CV curves of a) NC-8-1000, b) NC-8-900, c) NC-8-800, d) NC-4-1000, e) NC-1-1000, and f) NC-EDTA-1000 with different scanning rates of 10, 20, 30, 40, and 50 mV s<sup>-1</sup> for the ECSA calculation.

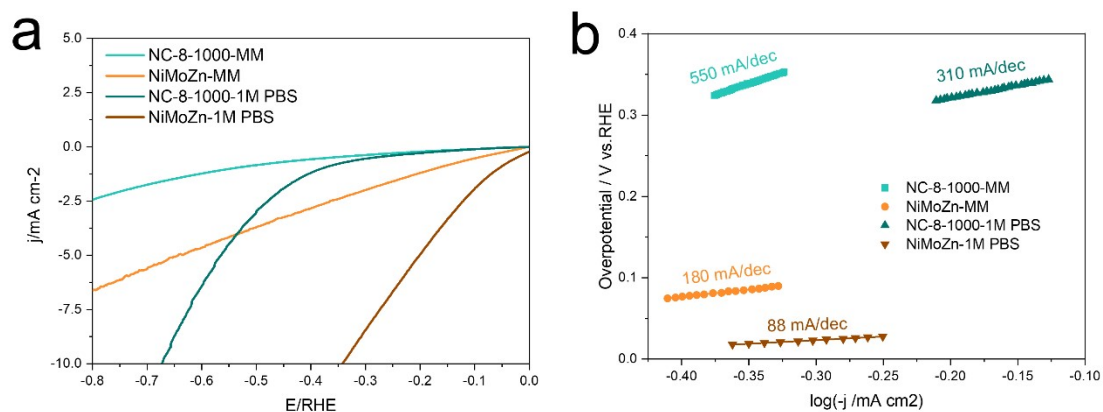

**Figure S7** a) LSV curves and b) Tafel plots of NC-8-1000 and NiMoZn in MM and 1 M PBS.

The catalytic activity of NiMoZn (onset potential  $-0.019$  V vs. RHE and Tafel slope  $94$  mV dec<sup>-1</sup>) was much higher than NC-8-1000 in 1M PBS due to the high conductivity and electron-rich properties of metal catalysts. Nevertheless, the catalytic activity of both NC-8-1000 and NiMoZn decreased significantly in MM. It is not surprising that the performance of inorganic catalysts is inhibited in the biological medium due to the low conductivity ( $8.8$  mS cm<sup>-1</sup> for 1 M PBS,  $1.8$  mS cm<sup>-1</sup> for MM) and the existence of complex interfering components (e.g., citric acid).

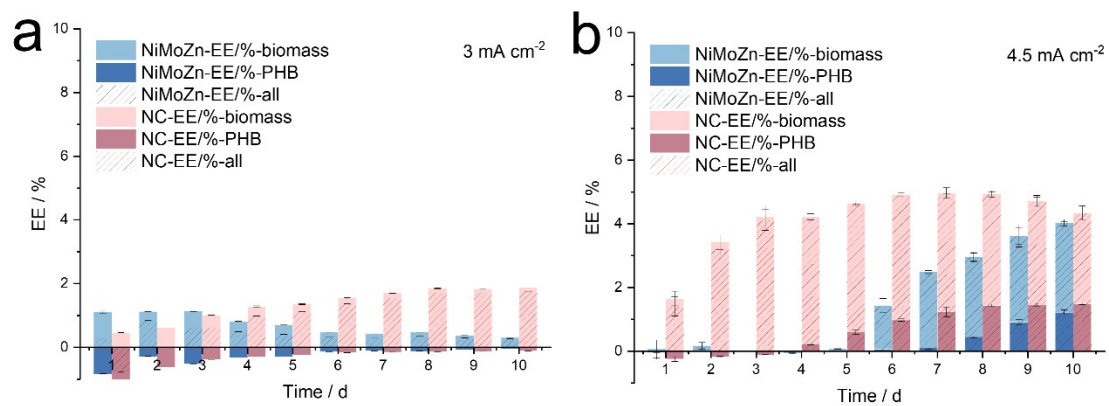

**Figure S8** The energy efficiency of converting electrical energy into organic matter, biomass, and PHB in the Pt | NiMoZn and Pt | NC hybrid system applied a) 3 mA cm<sup>-2</sup> and b) 4.5 mA cm<sup>-2</sup> current density.

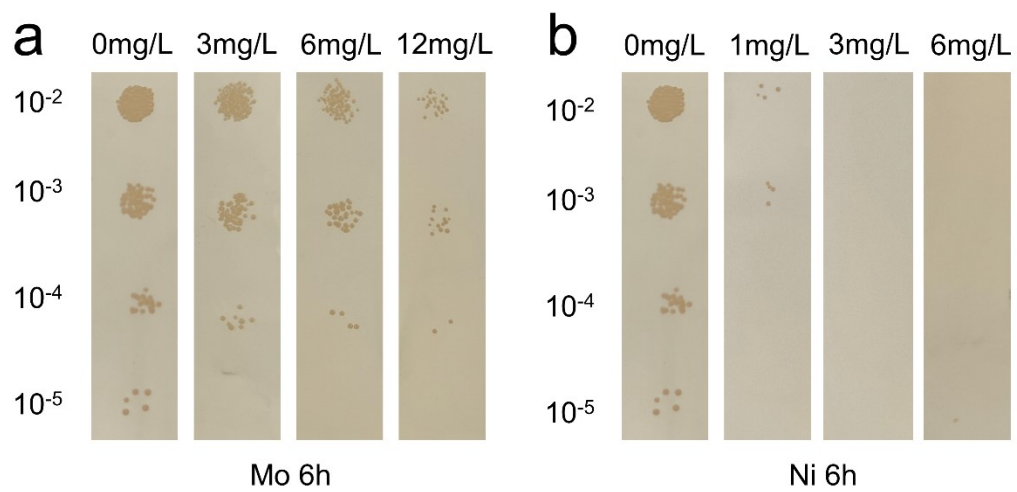

**Figure S9** Spot assay of *R. eutropha* H16 for different concentrations of metal ions (MoO<sub>4</sub><sup>2-</sup> and Ni<sup>2+</sup>).



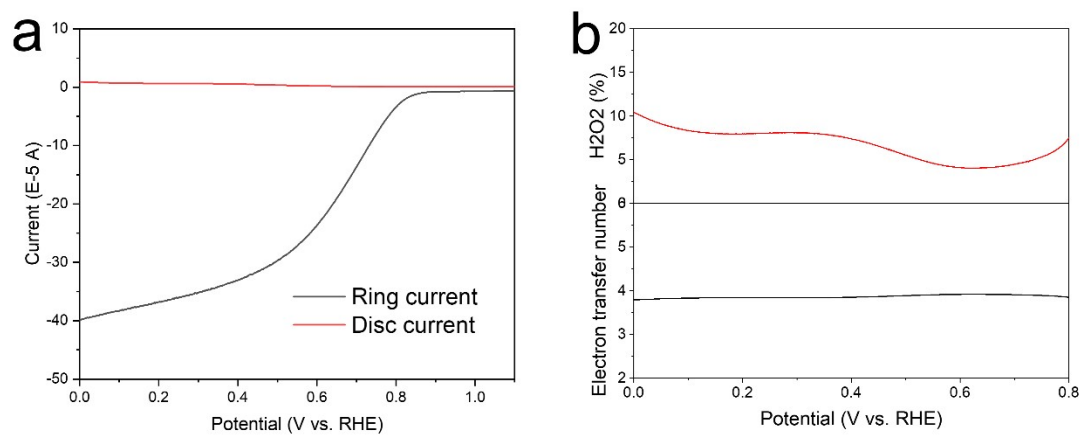

**Figure S10** a) RRDE polarization curves at 1600 rpm in O<sub>2</sub>-saturated MM solution with a scan rate of 10 mV s<sup>-1</sup>; b) H<sub>2</sub>O<sub>2</sub> selectivity and electron transfer number of NC-8-1000.

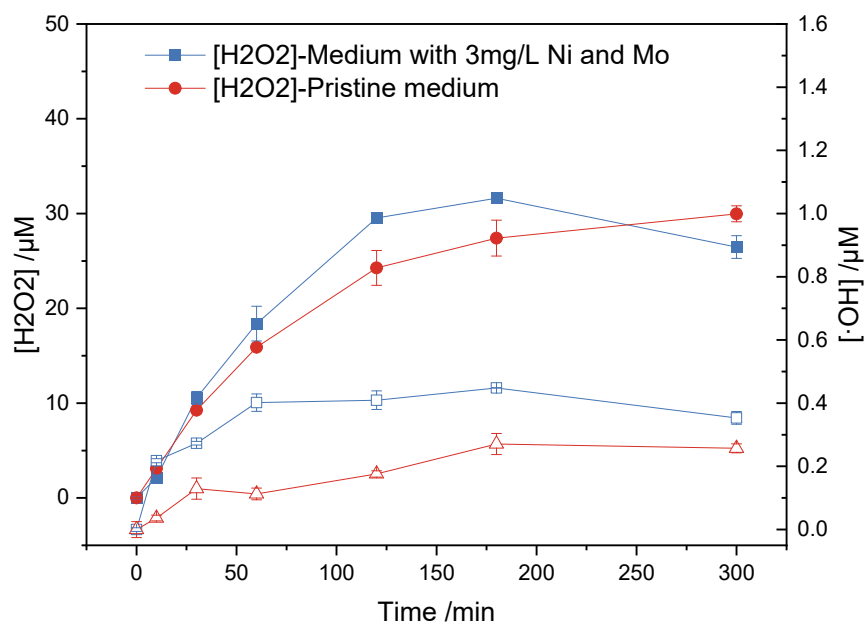

**Figure S11** The effect of metal ions ( $\text{MoO}_4^{2-}$  and  $\text{Ni}^{2+}$ ) on ROS production.

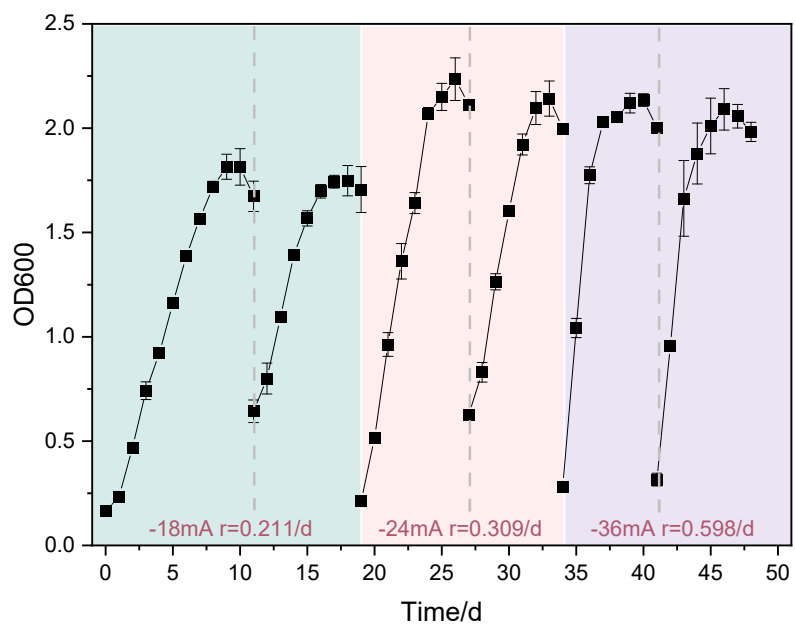

**Figure S12** OD<sub>600</sub> in the long-term experiment.

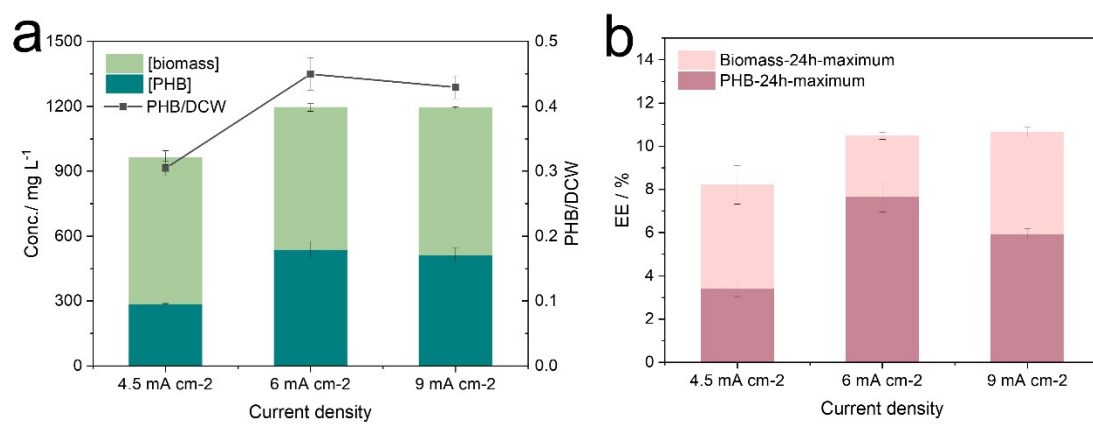

**Figure S13** a) maximum yield of biomass and PHB and the content of PHB in DCW b) 24h-maximum energy efficiency at different applied currents in the long-term experiment.

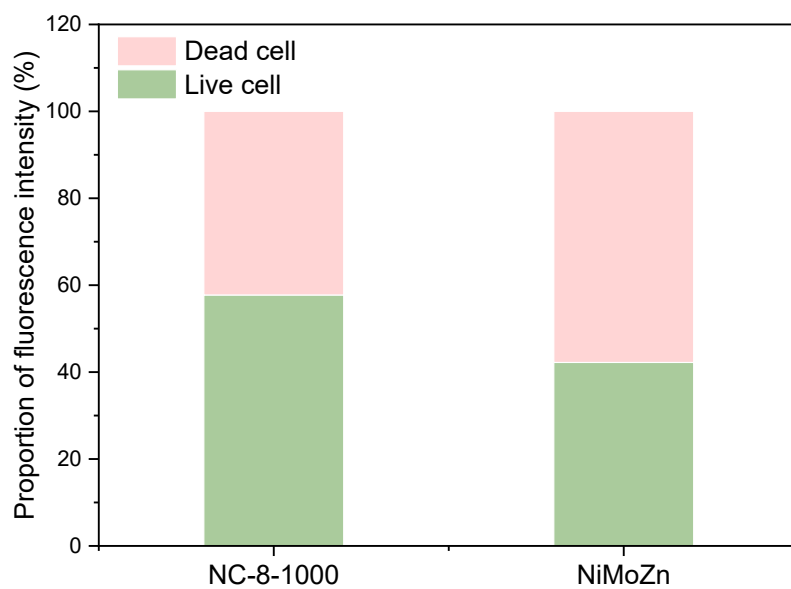

**Figure S14** Survival rate of *R. eutropha* H16 on the surface of electrodes loaded NC-8-1000 and NiMoZn. (The survival rates of *R. eutropha* H16 were calculated by the proportion of fluorescence intensity of dead and live cells in the CLSM images. The fluorescence intensity was analyzed by Image J.)

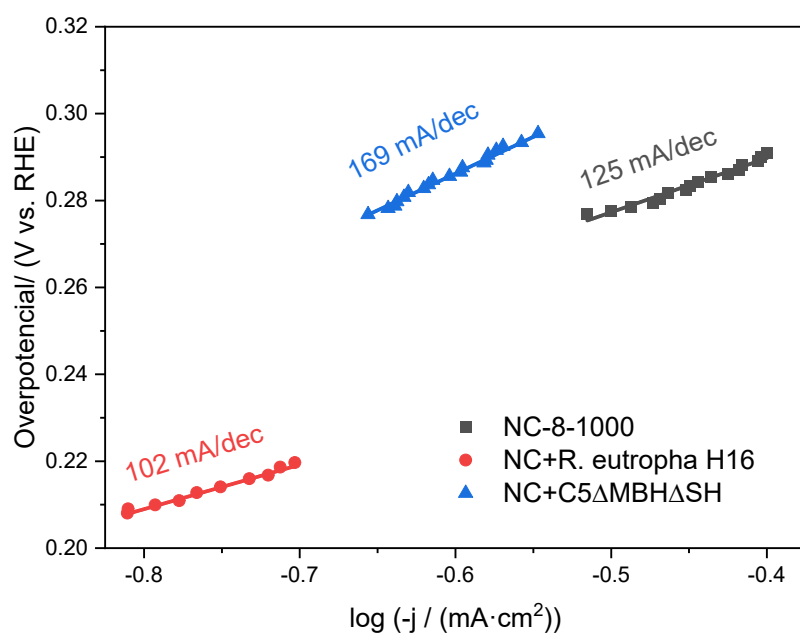

**Figure S15** Tafel plot of NC-8-1000, NC-8-1000 loading *R. eutropha H16*, and NC-8-1000 loading C5ΔMBHΔSH.

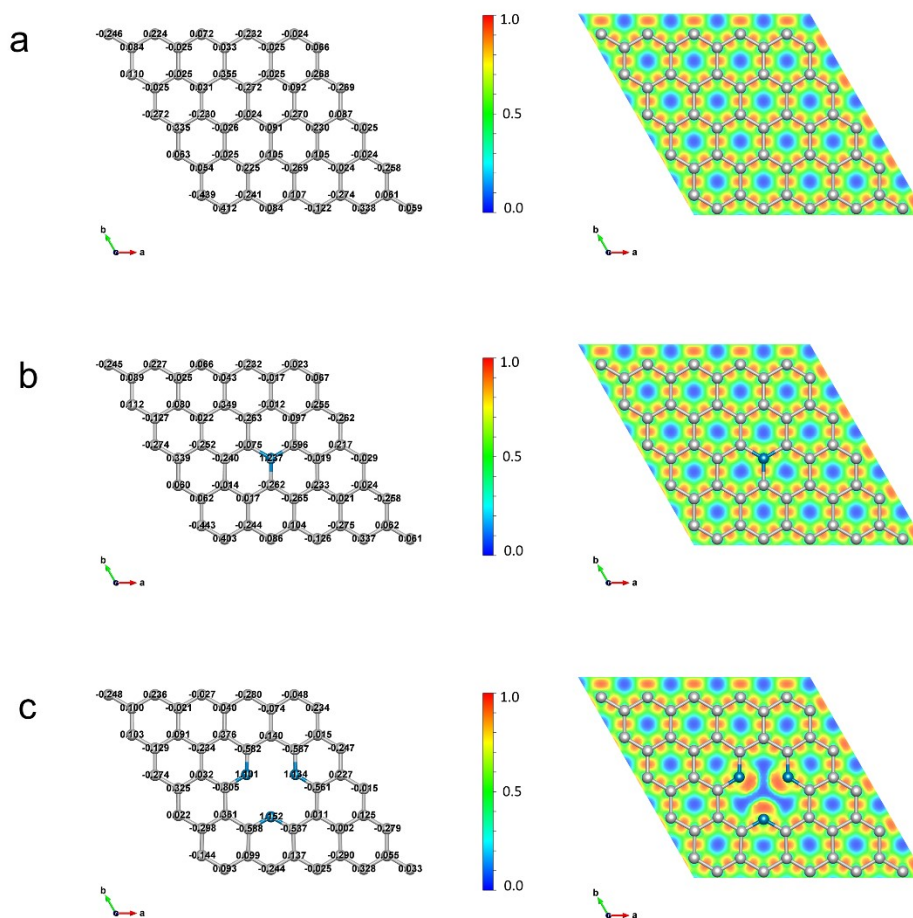

**Figure S16** The Bader charge and electron localization function (ELF) calculation results of a) non-nitrogen doping sample, b) graphitic N doping sample, and c) pyridinic N doping sample.

**Table S1** Atomic percent (at. %) of C, N, and O of all samples obtained from XPS results.

| <b>Atomic %</b> | <b>C</b> | <b>N</b> | <b>O</b> |
|-----------------|----------|----------|----------|
| NC-8-1000       | 89.85    | 4.63     | 5.52     |
| NC-4-1000       | 91.14    | 3.66     | 5.2      |
| NC-1-1000       | 91.14    | 3.26     | 5.61     |
| NC-EDTA-1000    | 94.12    | 3.11     | 2.77     |
| NC-8-900        | 90.93    | 5.04     | 4.03     |
| NC-8-800        | 87.99    | 7.54     | 4.47     |



**Table S2** Atomic concentrations (at. %) of C-C, C-N, C-O, and C=O of all samples in the C 1s binding energy region.

| <b>Relative C content / at. %</b> | C-C   | C-N   | C-O   | C=O  |
|-----------------------------------|-------|-------|-------|------|
| NC-8-1000                         | 37.80 | 35.40 | 10.12 | 6.53 |
| NC-4-1000                         | 36.60 | 40.47 | 10.05 | 4.02 |
| NC-1-1000                         | 42.17 | 35.57 | 7.88  | 5.52 |
| NC-EDTA-1000                      | 57.43 | 21.37 | 8.07  | 7.25 |
| NC-8-900                          | 39.20 | 38.10 | 9.50  | 4.14 |
| NC-8-800                          | 38.86 | 36.72 | 9.08  | 3.33 |

**Table S3** Atomic concentrations (at. %) of Pyridinic N, Pyrrolic N, Graphitic N, and Oxidated N of all samples in the N 1s binding energy region.

| <b>Relative N content<br/>/ at. %</b> | Pyridinic N | Pyrrolic N | Graphitic N | Oxidated N |
|---------------------------------------|-------------|------------|-------------|------------|
| NC-8-1000                             | 0.90        | 0.59       | 2.30        | 0.84       |
| NC-4-1000                             | 0.53        | 0.40       | 2.06        | 0.67       |
| NC-1-1000                             | 0.44        | 0.34       | 1.83        | 0.64       |
| NC-EDTA-1000                          | 0.34        | 0.31       | 1.95        | 0.51       |
| NC-8-900                              | 1.20        | 0.48       | 2.45        | 0.91       |
| NC-8-800                              | 2.53        | 0.22       | 3.61        | 1.18       |

**Table S4** BET results of all samples.

| <b>Sample</b> | <b>BET(m<sup>2</sup>/g)</b> | <b>Total pore volume (cm<sup>3</sup>/g)</b> |
|---------------|-----------------------------|---------------------------------------------|
| NC-8-1000     | 4765.615                    | 3.068                                       |
| NC-4-1000     | 900.269                     | 0.3684                                      |
| NC-1-1000     | 792.898                     | 0.3084                                      |
| NC-EDTA-1000  | 31.675                      | 0.01147                                     |
| NC-8-900      | 1328.347                    | 0.5672                                      |
| NC-8-800      | 684.643                     | 0.2695                                      |

**Table S5** Comparison of the HER performance of all samples in this work.

| <b>Sample</b> | <b>Onset potential<br/>(mV)</b> | <b>Tafel slope<br/>(mA/dec)</b> | <b>U<sub>-10mA</sub> (mV)</b> |
|---------------|---------------------------------|---------------------------------|-------------------------------|
| NC-8-1000     | 275                             | 125                             | 527                           |
| NC-4-1000     | 330                             | 416                             | 731                           |
| NC-1-1000     | 422                             | 583                             | 771                           |
| NC-EDTA-1000  | 679                             | 545                             | -                             |
| NC-8-900      | 341                             | 127                             | 687                           |
| NC-8-800      | 553                             | 463                             | -                             |
| Pt/C          | 66                              | 43                              | 124                           |

**Table S6** Comparison of the HER performance of NC-8-1000, NiMoZn, and NC-8-1000 after 6 cycles in different electrolytes.

| <b>electrolyte</b> | <b>cathode</b>           | <b>Onset potential (mV)</b> | <b>Tafel slope (mA/dec)</b> | <b>U<sub>-10mA</sub> (mV)</b> |
|--------------------|--------------------------|-----------------------------|-----------------------------|-------------------------------|
| 1M PBS             | NC-8-1000                | 282                         | 310                         | 672                           |
|                    | NC-8-1000 after 6 cycles | 22                          | 76                          | 494                           |
|                    | NiMoZn                   | 19                          | 88                          | 341                           |
| 72mM MM            | NC-8-1000                | 324                         | 550                         | -                             |
|                    | NC-8-1000 after 6 cycles | 108                         | 226                         | -                             |
|                    | NiMoZn                   | 75                          | 180                         | -                             |

**Table S7** Analysis of variance for the performance of microbial electrosynthesis in the long-term experiment.

| <b>p-value</b>          | <b>4.5 mA/cm<sup>2</sup></b> | <b>6 mA/cm<sup>2</sup></b> | <b>9 mA/cm<sup>2</sup></b> |
|-------------------------|------------------------------|----------------------------|----------------------------|
| <b>OD<sub>600</sub></b> | 0.69                         | 0.72                       | 0.73                       |
| <b>[Biomass]</b>        | 0.75                         | 0.80                       | 0.88                       |
| <b>[PHB]</b>            | 0.57                         | 0.74                       | 0.62                       |
| <b>PHB/DCW</b>          | 0.44                         | 0.87                       | 0.95                       |
| <b>EE-all/%</b>         | 0.63                         | 0.22                       | 0.68                       |
| <b>EE-PHB/%</b>         | 0.60                         | 0.61                       | 0.82                       |
| <b>EE-biomass/%</b>     | 0.98                         | 0.59                       | 0.62                       |

One-way analysis of variance (ANOVA) was analyzed ( $\alpha = 0.05$ ) for the performance of microbial electrosynthesis in the long-term experiment. To exclude the influence of different cycle lengths, the last 7 days of each cycle were selected uniformly for calculation. The result of the p-value is listed in Table 5.  $P > 0.05$  is "not significant",  $P \leq 0.05$  is "significant",  $P \leq 0.01$  is "very significant".

**Table S8** Comparison to previous studies of bioelectrochemical systems for CO<sub>2</sub> fixation.

| Source                                            | This work                 | Li. et al. <sup>7</sup>   | Schlegel et al. <sup>8</sup> | Li. et al. <sup>9</sup>     | Torella et al. <sup>10</sup> | Torella et al. <sup>10</sup>           |
|---------------------------------------------------|---------------------------|---------------------------|------------------------------|-----------------------------|------------------------------|----------------------------------------|
| <b>Organism/strain</b>                            | <i>R. eutropha</i><br>H16 | <i>R. eutropha</i><br>H16 | <i>R. eutropha</i><br>H16    | <i>R. eutropha</i><br>LH74D | <i>R. eutropha</i><br>H16    | <i>R. eutropha</i><br>Re2133-<br>pEG12 |
| <b>Cathode</b>                                    | NC                        | Ni@N-C                    | Pt                           | In                          | NiMoZn                       | SS                                     |
| <b>Anode</b>                                      | Pt                        | Pt                        | Pt                           | Pt                          | CoP <sub>i</sub>             | CoP <sub>i</sub>                       |
| <b>Total Cell Potential, E<sub>cell</sub> (V)</b> | 3.8                       | ~4                        | ~5                           | ~4                          | 2.7                          | 3.0                                    |
| <b>Reactor volume, V (mL)</b>                     | 150                       | 150                       | 1000                         | 350                         | 35                           | 35                                     |
| <b>Product 1</b>                                  | PHB                       | PHB                       | -                            | isobutanol                  | -                            | isobutanol                             |
| <b>Product 1 Amount (mg/L)</b>                    | 538.0                     | 384.3                     | -                            | ~100                        | -                            | 216                                    |
| <b>Product 2</b>                                  | -                         | -                         | -                            | 3-methyl-<br>1-butanol      | -                            | -                                      |
| <b>Product 2 Amount (mg/L)</b>                    | -                         | -                         | -                            | ~50                         | -                            | -                                      |
| <b>Electricity-to-organic Efficiency</b>          | 7.3%                      | 6.6%                      | 4.8%                         | 2.3%                        | 13%                          | 6.1%                                   |
| <b>Electricity-to-Biomass Efficiency</b>          | 4.3%                      | -                         | 4.8%                         | 1.8%                        | 13%                          | 4.6%                                   |
| <b>Electricity-to-product Efficiency</b>          | 3.0%                      | -                         | -                            | 0.5%                        | -                            | 1.5%                                   |

**Table S9** EDS result of NC-8-1000/CP.

| <b>Elt.</b>  | <b>Line</b> | <b>Intensity<br/>(c/s)</b> | <b>Atomic<br/>%</b> | <b>Atomic<br/>Ratio</b> | <b>Conc</b> | <b>Units</b> | <b>Error<br/>2-sig</b> | <b>MDL<br/>3-sig</b> |
|--------------|-------------|----------------------------|---------------------|-------------------------|-------------|--------------|------------------------|----------------------|
| C            | Ka          | 193.28                     | 91.227              | 13.0869                 | 86.751      | wt.%         | 4.224                  | 2.313                |
| N            | Ka          | .00                        | .000                | .0000                   | .000        | wt.%         | .000                   | .000                 |
| O            | Ka          | 4.97                       | 6.971               | 1.0000                  | 8.830       | wt.%         | 4.195                  | 5.152                |
| P            | Ka          | 17.45                      | 1.802               | .2585                   | 4.419       | wt.%         | .833                   | .759                 |
| <b>Total</b> |             |                            | 100.000             |                         | 100.000     | wt.%         |                        |                      |



**Table S10** EDS result of NC-8-1000@CP after 6 cycles.

| <b>Elt.</b>  | <b>Line</b> | <b>Intensity<br/>(c/s)</b> | <b>Atomic<br/>%</b> | <b>Atomic<br/>Ratio</b> | <b>Conc</b> | <b>Units</b> | <b>Error<br/>2-sig</b> | <b>MDL<br/>3-sig</b> |
|--------------|-------------|----------------------------|---------------------|-------------------------|-------------|--------------|------------------------|----------------------|
| C            | Ka          | 23.94                      | 30.014              | .7366                   | 17.157      | wt.%         | 2.632                  | 2.171                |
| N            | Ka          | 9.80                       | 1.528               | .0375                   | 1.768       | wt.%         | .500                   | .535                 |
| O            | Ka          | 71.60                      | 40.744              | 1.0000                  | 31.025      | wt.%         | 2.414                  | 1.027                |
| Na           | Ka          | 24.73                      | 5.082               | .1247                   | 5.560       | wt.%         | .828                   | .660                 |
| P            | Ka          | 104.76                     | 11.082              | .2720                   | 16.336      | wt.%         | 1.075                  | .569                 |
| K            | Ka          | 30.58                      | 3.376               | .0829                   | 6.283       | wt.%         | .782                   | .471                 |
| Fe           | Ka          | 29.25                      | 7.112               | .1745                   | 18.902      | wt.%         | 2.342                  | 1.186                |
| Ni           | Ka          | 2.84                       | 1.063               | .0261                   | 2.969       | wt.%         | 1.114                  | 1.671                |
| <b>Total</b> |             |                            | 100.000             |                         | 100.000     | wt.%         |                        |                      |

**Table S11** Comparison of the HER performance of NC-8-1000, NC-8-1000 loading *R. eutropha* H16, and NC-8-1000 loading C5ΔMBHASH.

| <b>Sample</b>                 | <b>Onset potential<br/>(mV)</b> | <b>Tafel slope<br/>(mA/dec)</b> | <b>U<sub>-10mA</sub> (mV)</b> |
|-------------------------------|---------------------------------|---------------------------------|-------------------------------|
| NC-8-1000                     | 275                             | 125                             | 527                           |
| NC-8-1000@ <i>R. eutropha</i> | 223                             | 102                             | 450                           |
| NC-8-1000@C5ΔMBHASH           | 302                             | 169                             | 597                           |

## References

1. Reece, S. Y.; Hamel, J. A.; Sung, K.; Jarvi, T. D.; Esswein, A. J.; Pijpers, J. J. H.; Nocera, D. G. Wireless Solar Water Splitting Using Silicon-Based Semiconductors and Earth-Abundant Catalysts. *Science* **2011**, *334* (6056), 645-648.
2. Liu, C.; Colon, B. C.; Ziesack, M.; Silver, P. A.; Nocera, D. G. Water splitting-biosynthetic system with CO<sub>2</sub> reduction efficiencies exceeding photosynthesis. *Science* **2016**, *352* (6290), 1210-1213.
3. Kresse, G.; Furthmuller, J. Efficiency of ab-initio total energy calculations for metals and semiconductors using a plane-wave basis set. *Comput. Mater. Sci.* **1996**, *6* (1), 15-50.
4. Blochl, P. E. Projector Augmented-Wave Method. *Phys. Rev. B* **1994**, *50* (24), 17953-17979.
5. Perdew, J. P.; Chevary, J. A.; Vosko, S. H.; Jackson, K. A.; Pederson, M. R.; Singh, D. J.; Fiolhais, C. Atoms, Molecules, Solids, and Surfaces - Applications of the Generalized Gradient Approximation for Exchange and Correlation. *Phys. Rev. B* **1992**, *46* (11), 6671-6687.
6. Grimme, S.; Antony, J.; Ehrlich, S.; Krieg, H. A consistent and accurate ab initio parametrization of density functional dispersion correction (DFT-D) for the 94 elements H-Pu. *J. Chem. Phys.* **2010**, *132* (15).
7. Li, Z. J.; Li, G.; Chen, X. L.; Xia, Z.; Yang, B.; Yao, J. N.; Lei, L. C.; Hou, Y. Water Splitting-Biosynthetic Hybrid System for CO<sub>2</sub> Conversion using Nickel Nanoparticles Embedded in N-Doped Carbon Nanotubes. *ChemSusChem* **2018**, *11* (14), 2382-2387.
8. Schuster, E.; Schlegel, H. G. Chemolithotrophic growth of *Hydrogenomonas* H16 in a chemostat with electrolytic production of oxygen and hydrogen. *Arch. Microbiol.* **1967**, *58* (4), 380-&, DOI: 10.1007/BF00409745.
9. Li, H.; Opgenorth, P. H.; Wernick, D. G.; Rogers, S.; Wu, T. Y.; Higashide, W.; Malati, P.; Huo, Y. X.; Cho, K. M.; Liao, J. C. Integrated Electromicrobial Conversion of CO<sub>2</sub> to Higher Alcohols. *Science* **2012**, *335* (6076), 1596-1596.
10. Torella, J. P.; Gagliardi, C. J.; Chen, J. S.; Bediako, D. K.; Colon, B.; Way, J. C.; Silver, P. A.; Nocera, D. G. Efficient solar-to-fuels production from a hybrid microbial-water-splitting catalyst system (vol 112, pg 23337, 2015). *Proc. Natl. Acad. Sci. U. S. A.* **2015**, *112* (12), E1507-E1507.
